# Supplementary material for: Migratory dendritic cells in skin-draining lymph nodes have nickel-binding capabilities
Source: PubMed Central journal article supplement (PMC7081353; doi:10.1038/s41598-020-61875-6), 2020-03-19
Supplement: 41598_2020_61875_MOESM1_ESM.pdf [file 41598_2020_61875_MOESM1_ESM.pdf]

# **Migratory dendritic cells in skin-draining lymph nodes have nickel-binding capabilities**

Toshinobu KUROISHI, Kanan BANDO, Reiska Kumala BAKTI, Gaku OUCHI,  
Yukinori TANAKA, and Shunji SUGAWARA

**Supplementary Table S1. Antibodies used for flow cytometry**

| Antigen                | Clone       | Fluorochrome         | Manufacturer |
|------------------------|-------------|----------------------|--------------|
| B220 (CD45R)           | RA3-6B2     | PE                   | BioLegend    |
|                        |             | PE/Cy5               | BioLegend    |
| CCR7                   | 4B12        | APC                  | BioLegend    |
| CD103                  | 2E7         | APC                  | BioLegend    |
| CD11b                  | M1/70       | PerCP/Cy5.5          | BioLegend    |
|                        |             | APC/Cy7              | BioLegend    |
| CD11c                  | N418        | PE/Cy7               | BioLegend    |
| CD19                   | 1D3         | PE/Cy5               | BioLegend    |
| CD4                    | RM4-5       | APC/Cy7              | BioLegend    |
| CD45                   | 30-F11      | PerCP                | BioLegend    |
| CD45.1                 | A20         | Brilliant Violet 421 | BioLegend    |
| CD45.2                 | 104         | FITC                 | BioLegend    |
| CD207 (langerin)       | 4C7         | PE                   | BioLegend    |
| CD8 $\alpha$           | 53-6.7      | Alexa Fluor 647      | BioLegend    |
| EpCAM (CD326)          | G8.8        | APC/Cy7              | BioLegend    |
| F4/80                  | BM8         | APC                  | BioLegend    |
| MHC class II (I-Ab)    | AF6-120.1   | Pacific blue         | BioLegend    |
| MHC class II (I-A/I-E) | M5/114.15.2 | Pacific blue         | BioLegend    |
|                        |             | PE/Cy7               |              |
| TCR $\beta$            | H57-597     | PE, PE/Cy5           | BioLegend    |

|                  |         |                 |             |
|------------------|---------|-----------------|-------------|
| PDCA1 (CD317)    | 129C1   | Alexa Fluor 647 | BioLegend   |
| XCR1             | ZET     | APC             | BioLegend   |
| Pro-IL-1 $\beta$ | NJTEN-3 | PE              | eBioscience |

**Supplementary Table S2. Primers used for quantitative RT-PCR**

| Target<br>(Accession number)        |         | Sequence               |
|-------------------------------------|---------|------------------------|
| Mouse IL-1 $\beta$<br>(M15131)      | Forward | TTCAGGCAGGCAGTATCA     |
|                                     | Reverse | CCAGCAGGTTATCATCATCATC |
| Mouse TNF $\alpha$<br>(M13049)      | Forward | AGCCTCTTCTCATTCTGC     |
|                                     | Reverse | GGAGGCCATTTGGGAACT     |
| Mouse $\beta$ -actin<br>(NM_007393) | Forward | CGTTGACATCCGTAAAGACCTC |
|                                     | Reverse | AGCCACCGATCCACACAGA    |

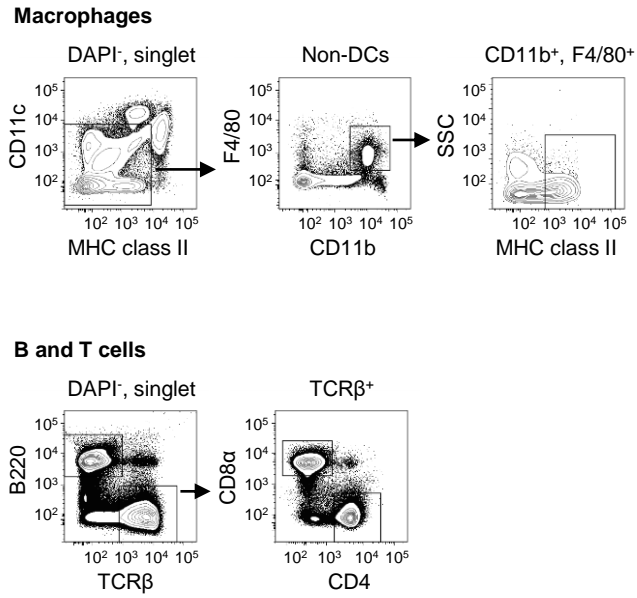

**Figure S1.** Gating strategies of macrophages (non-DCs CD11b<sup>+</sup>F4/80<sup>+</sup>MHC class II<sup>+</sup>), B220<sup>+</sup> B cells, and CD4<sup>+</sup> and CD8α<sup>+</sup> T cells are shown.

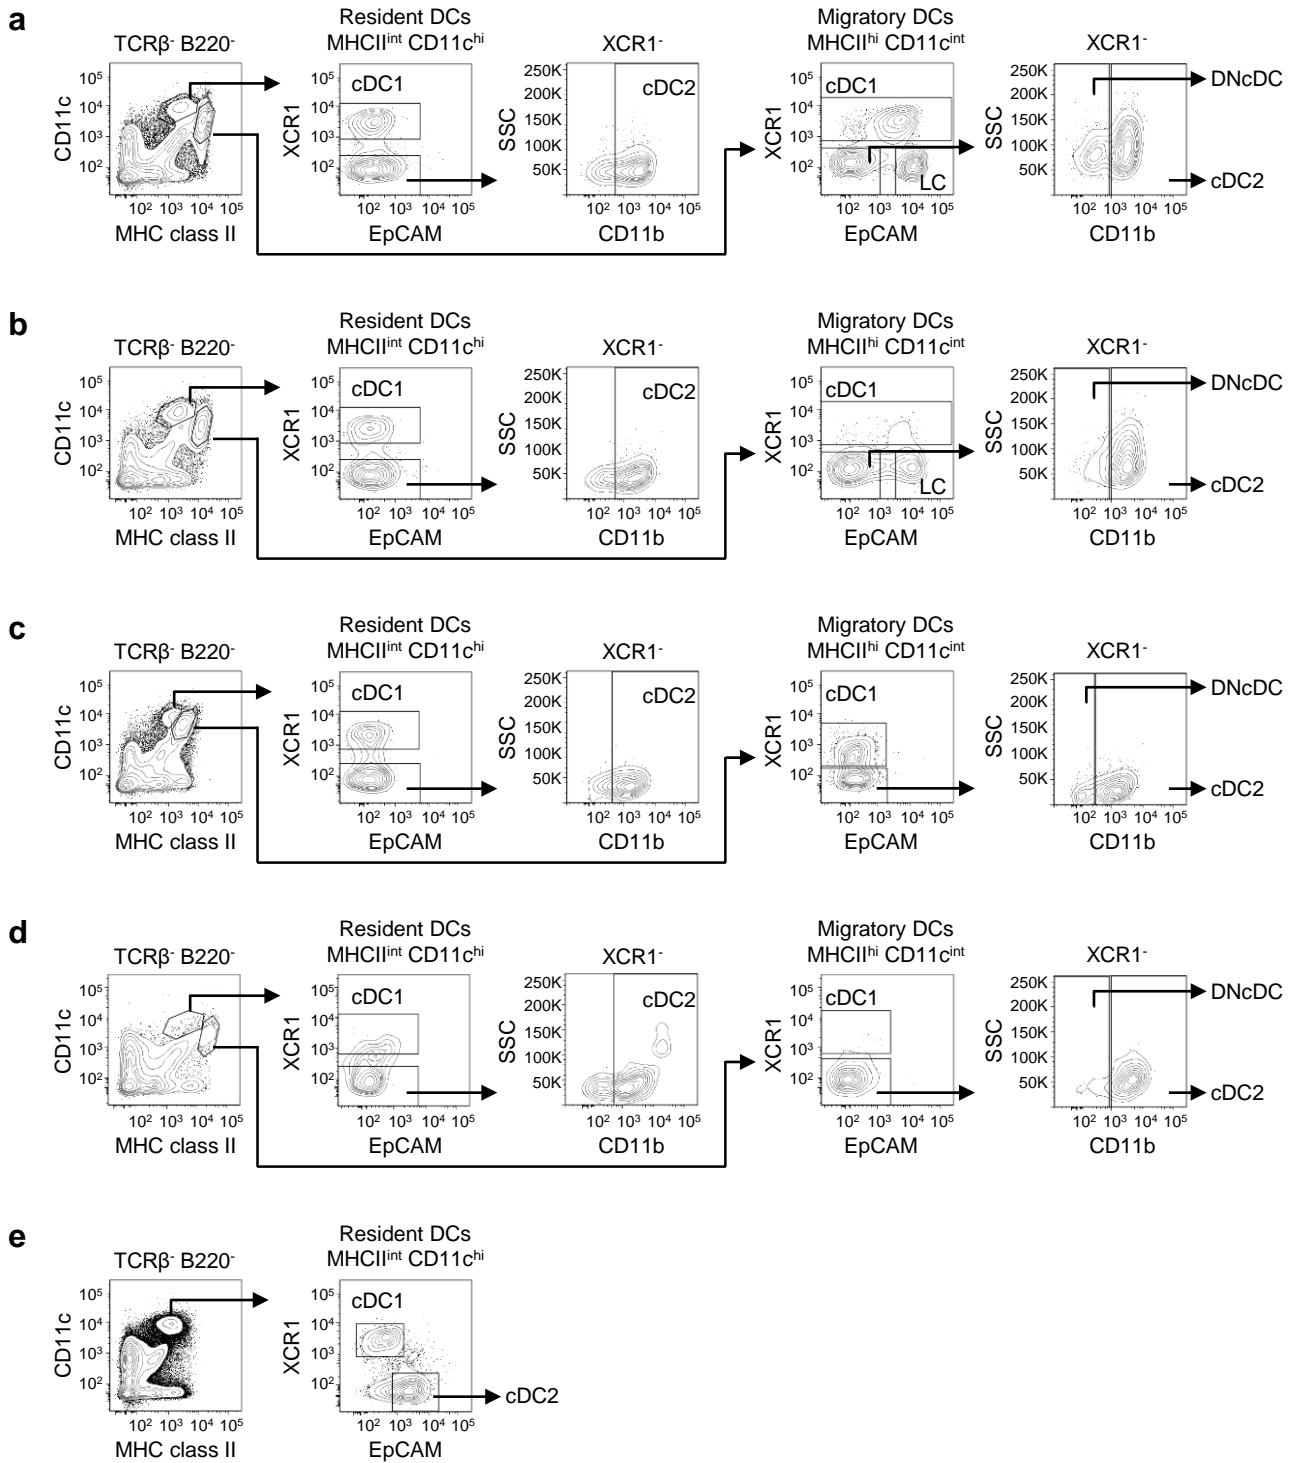

**Figure S2.** Gating strategies of skin-draining (a), mandibular (b), mesenteric (c), and medial iliac (d) LNs, and the spleen (e) are shown.

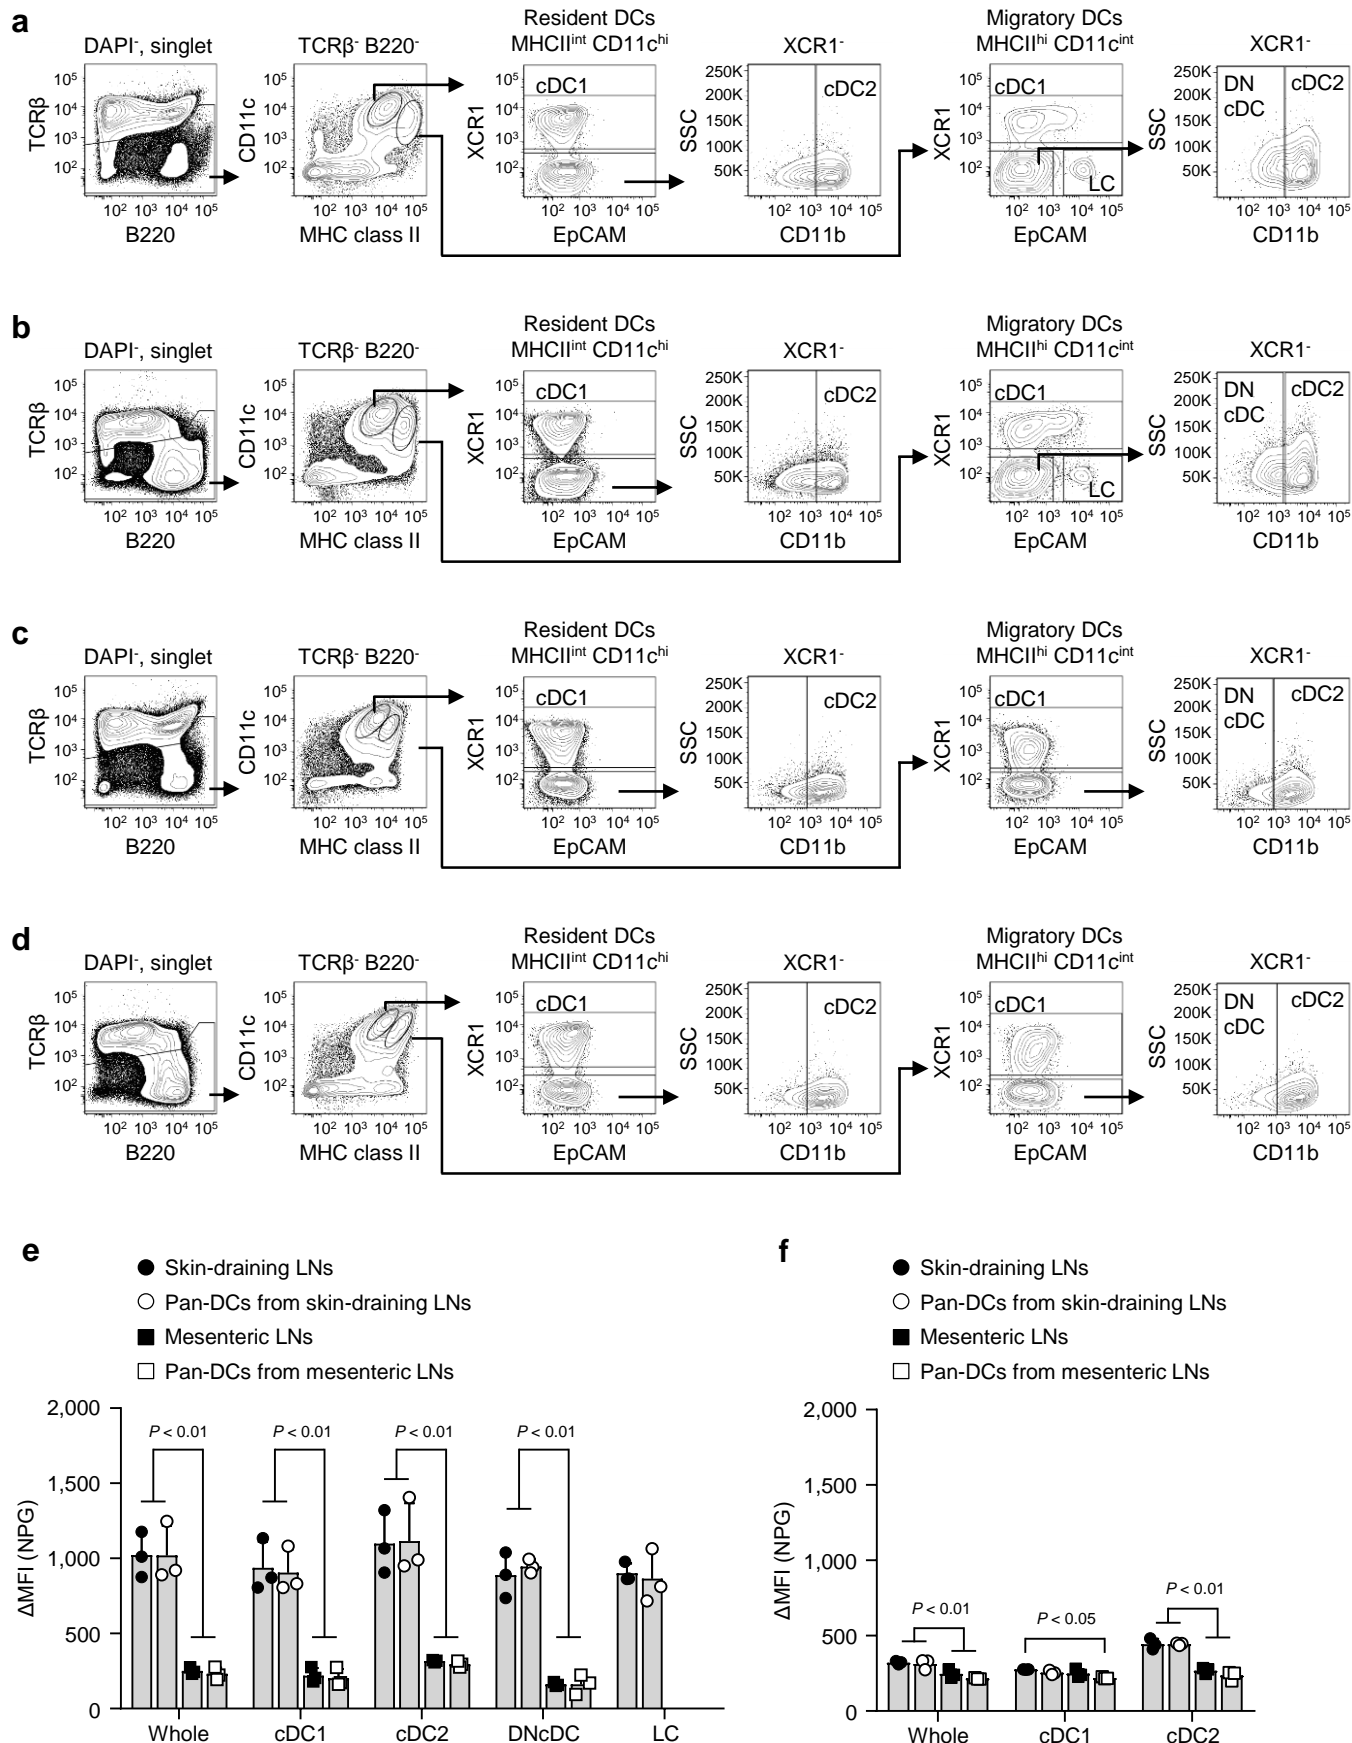

**Figure S3. Ni-NPG staining of skin-draining and mesenteric LN cells and pan-DCs from mice inoculated with B16-Flt3L.** (a-d) The gating strategy is shown. a, skin-draining LN cells; b, pan-DCs from skin-draining LNs; c, mesenteric LN cells; d, pan-DCs from mesenteric LNs. (e and f) Cells were incubated with 100  $\mu$ M NiCl<sub>2</sub> for 60 min followed by NPG. The Ni-NPG staining of migratory (e) and resident (f) DCs was analyzed. Results are shown as  $\Delta$ MFI. Bars represent the mean  $\pm$  SD of 3 mice. Each symbol represents the value from each mouse.

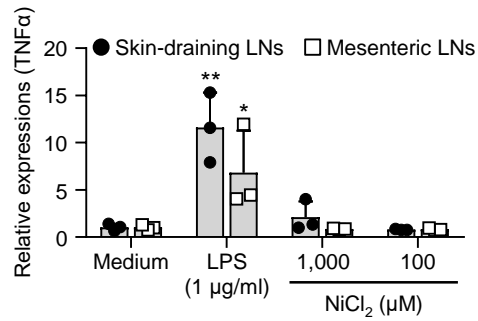

**Figure S4.** The pan-DC fraction from skin-draining or mesenteric LNs was incubated with LPS or NiCl<sub>2</sub> for 4 h. The mRNA expression levels of TNF $\alpha$  were analyzed by quantitative RT-PCR. Results represent the mean  $\pm$  SD of three independent experiments. Each symbol represents the value from an independent experiment. \* $P < 0.05$ , \*\* $P < 0.01$ , significantly different from the medium.



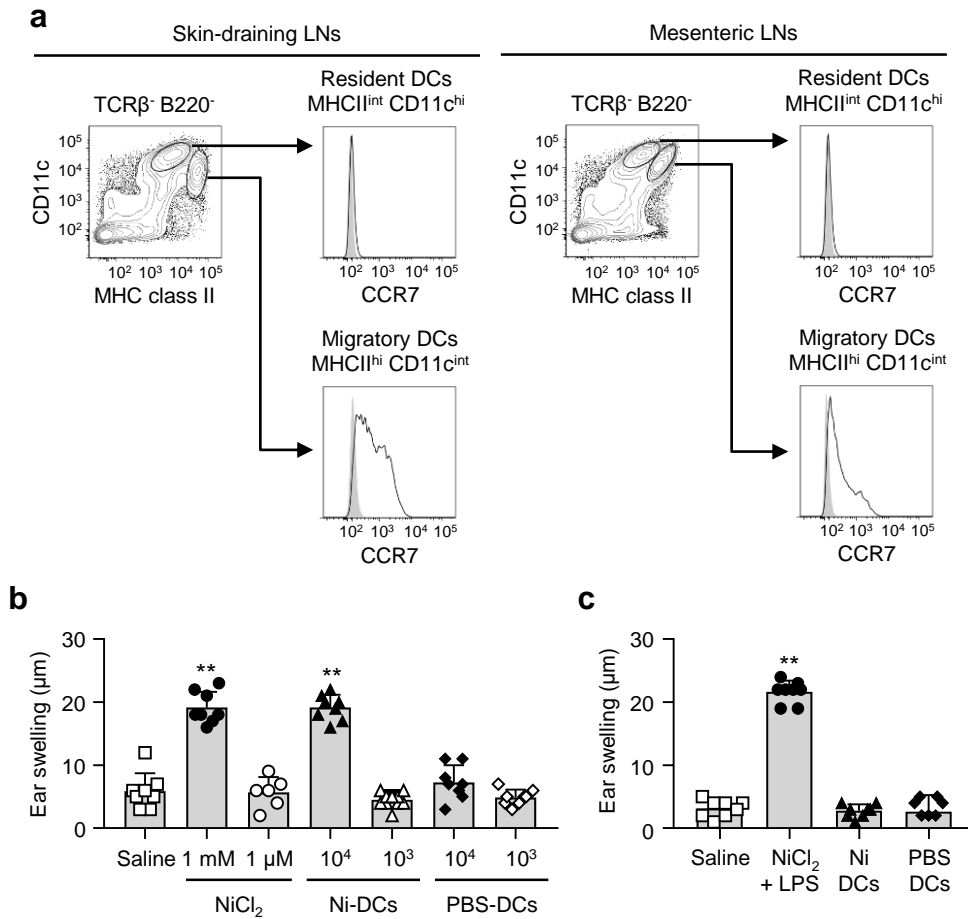

**Figure S5.** (a) Histograms represent CCR7 expression of migratory and resident DCs in skin-draining and mesenteric LNs from mice inoculated with B16-Flt3L (black line: anti-CCR7, gray-shaded: fluorescence minus one). Results are representative of three mice. (b) The ear pinnae of Ni-sensitized mice were i.d. challenged with NiCl<sub>2</sub> or DCs prepared from skin-draining LNs. (c) Mice were i.p. sensitized with 0.5 mM NiCl<sub>2</sub> and 0.5 μg/ml LPS or s.c. sensitized with DCs (1 × 10<sup>5</sup> cells). Two weeks after sensitization, the ear pinnae were i.d. challenged with 1 mM NiCl<sub>2</sub>. Bars show ear swelling 48 h after the challenge. Results represent the mean ± SD of 6-8 pinnae (3-4 mice). Each symbol represents the value from each pinna. \*\**P* < 0.01, significantly different from the control (saline).
